# Supplementary material for: Computational Integration of Homolog and Pathway Gene Module Expression Reveals General Stemness Signatures
Source: PLoS One. 2011 Apr 29;6(4):e18968. doi: 10.1371/journal.pone.0018968 (PMC3084730; doi:10.1371/journal.pone.0018968)
Supplement: Dataset S3 — List of all 40 stemness genes identified by S-MAP, along with their corresponding stem cell recurrence and diversity scores. Gene names, annotations, and descriptions are provided for all genes. (XLS) [file pone.0018968.s009.xls]

## Sheet: stemness_on_genes
Entrez Gene ID	Gene name	Gene description	Recurrence score	Cell diversity score
18392	Orc1l	origin recognition complex, subunit 1-like (S.cereviaiae)	6.91845	2.88211
23918	Impdh2	inosine 5'-phosphate dehydrogenase 2	6.67034	2.79965
12465	Cct5	chaperonin subunit 5 (epsilon)	5.966	2.78682
53605	Nap1l1	nucleosome assembly protein 1-like 1	5.92465	2.73028
12444	Ccnd2	cyclin D2	10.6253	2.72332
319757 (old: 20596)	Smo	smoothened homolog (Drosophila) 1	6.7857	2.72286
17217	Mcm4	minichromosome maintenance deficient 4 homolog (S. cerevisiae)	8.10617	2.7061
17218	Mcm5	minichromosome maintenance deficient 5, cell division cycle 46 (S. cerevisiae)	7.12296	2.69453
15201	Hells	helicase, lymphoid specific	8.40273	2.68574
53379	Hnrnpa2b1	heterogeneous nuclear ribonucleoprotein A2/B1	4.55436	2.68448
12469	Cct8	chaperonin subunit 8 (theta)	4.37943	2.684
12822	Col18a1	collagen, type XVIII, alpha 1	9.64191	2.66001
20383	Sfrs3	splicing factor, arginine/serine-rich 3 (SRp20)	7.59803	2.64705
20135	Rrm2	ribonucleotide reductase M2	7.53808	2.63829
12235	Bub1	budding uninhibited by benzimidazoles 1 homolog (S. cerevisiae)	6.45167	2.63536
17975	Ncl	nucleolin	7.25911	2.63283
16647	Kpna2	karyopherin (importin) alpha 2	4.33735	2.6302
20425	Shmt1	serine hydroxymethyltransferase 1 (soluble)	11.8698	2.62578
70572	Ipo5	importin 5	8.5932	2.62239
56505	Ruvbl1	RuvB-like protein 1	8.31641	2.61778
27428	Shroom3	shroom family member 3	7.65234	2.61695
13411	Dnahc11	dynein, axonemal, heavy chain 11	5.31396	2.61654
23834	Cdc6	cell division cycle 6 homolog (S. cerevisiae)	8.5211	2.61245
22137	Ttk	Ttk protein kinase	6.27658	2.61047
66197	Cks2	CDC28 protein kinase regulatory subunit 2	6.51607	2.60687
17216	Mcm2	minichromosome maintenance deficient 2 mitotin (S. cerevisiae)	8.29709	2.60609
60530	Fignl1	fidgetin-like 1	5.45462	2.60312
69740	Dph5	DPH5 homolog (S. cerevisiae)	5.07104	2.56566
67177	Cdt1	chromatin licensing and DNA replication factor 1	7.81177	2.56501
12462	Cct3	chaperonin subunit 3 (gamma)	7.61958	2.5648
14049	Eya2	eyes absent 2 homolog (Drosophila)	6.44581	2.56299
18538	Pcna	proliferating cell nuclear antigen	7.36239	2.56239
56086	Set	SET translocation	5.30482	2.55517
19139	Prps1	phosphoribosyl pyrophosphate synthetase 1	7.49308	2.5508
14113	Fbl	fibrillarin	5.04623	2.55019
21915	Dtymk	deoxythymidylate kinase	7.60854	2.54816
381760 (old:72790)	Ssbp1	single-stranded DNA binding protein 1	5.60071	2.53494
97998	Depdc6	DEP domain containing 6	8.9516	2.52024
21973	Top2a	topoisomerase (DNA) II alpha	5.57332	2.51365
13008	Csrp2	cysteine and glycine-rich protein 2	5.5707	2.50633

## Sheet: stemness_off_genes
Entrez Gene ID	Gene name	Gene description	Recurrence score	Cell diversity score
12266	C3	complement component 3	7.35257	2.58779
14677	Gnai1	guanine nucleotide binding protein (G protein), alpha inhibiting	5.49727	2.58207
20200	S100a6	S100 calcium binding protein A6 (calcyclin)	13.5383	2.68674
17260	Mef2c	myocyte enhancer factor 2C	5.13718	2.50917
